# Supplementary material
Source: HighWire-hosted journal article supplement (https://thorax.bmj.com/content/thoraxjnl-2020-216549)
Supplement: inline-supplementary-material-1 [file inline-supplementary-material-1.pdf]

## **Supplementary material**

**Temperature variability and asthma hospitalization in Brazil, 2000-2015: A nationwide case-crossover study**

**Table S1.** Baseline characteristics of 1,816 Brazilian cities, 2000-2015.

| Characteristic | Number of cities | Population coverage (%) |
|----------------|------------------|-------------------------|
| Total          | 1,816            | 79.0                    |
| Region         |                  |                         |
| North          | 30               | 27.0                    |
| Northeast      | 662              | 78.0                    |
| Central west   | 128              | 80.7                    |
| South          | 374              | 83.2                    |
| Southeast      | 622              | 87.0                    |

**Table S2.** Consumer price index in Brazil from 2000 to 2015.

| Year | Consumer price index compared to previous year (%) | Index    | Consumer price index of 2015 compared to current year (%)                                                                                                                         |
|------|----------------------------------------------------|----------|-----------------------------------------------------------------------------------------------------------------------------------------------------------------------------------|
| 2000 | 107.044                                            | $y_{16}$ | $y_1 \times y_2 \times y_3 \times y_4 \times y_5 \times y_6 \times y_7 \times y_8 \times y_9 \times y_{10} \times y_{11} \times y_{12} \times y_{13} \times y_{14} \times y_{15}$ |
| 2001 | 106.840                                            | $y_{15}$ | $y_1 \times y_2 \times y_3 \times y_4 \times y_5 \times y_6 \times y_7 \times y_8 \times y_9 \times y_{10} \times y_{11} \times y_{12} \times y_{13} \times y_{14}$               |
| 2002 | 108.450                                            | $y_{14}$ | $y_1 \times y_2 \times y_3 \times y_4 \times y_5 \times y_6 \times y_7 \times y_8 \times y_9 \times y_{10} \times y_{11} \times y_{12} \times y_{13}$                             |
| 2003 | 114.715                                            | $y_{13}$ | $y_1 \times y_2 \times y_3 \times y_4 \times y_5 \times y_6 \times y_7 \times y_8 \times y_9 \times y_{10} \times y_{11} \times y_{12}$                                           |
| 2004 | 106.597                                            | $y_{12}$ | $y_1 \times y_2 \times y_3 \times y_4 \times y_5 \times y_6 \times y_7 \times y_8 \times y_9 \times y_{10} \times y_{11}$                                                         |
| 2005 | 106.870                                            | $y_{11}$ | $y_1 \times y_2 \times y_3 \times y_4 \times y_5 \times y_6 \times y_7 \times y_8 \times y_9 \times y_{10}$                                                                       |
| 2006 | 104.184                                            | $y_{10}$ | $y_1 \times y_2 \times y_3 \times y_4 \times y_5 \times y_6 \times y_7 \times y_8 \times y_9$                                                                                     |
| 2007 | 103.641                                            | $y_9$    | $y_1 \times y_2 \times y_3 \times y_4 \times y_5 \times y_6 \times y_7 \times y_8$                                                                                                |
| 2008 | 105.679                                            | $y_8$    | $y_1 \times y_2 \times y_3 \times y_4 \times y_5 \times y_6 \times y_7$                                                                                                           |
| 2009 | 104.888                                            | $y_7$    | $y_1 \times y_2 \times y_3 \times y_4 \times y_5 \times y_6$                                                                                                                      |
| 2010 | 105.039                                            | $y_6$    | $y_1 \times y_2 \times y_3 \times y_4 \times y_5$                                                                                                                                 |
| 2011 | 106.636                                            | $y_5$    | $y_1 \times y_2 \times y_3 \times y_4$                                                                                                                                            |
| 2012 | 105.403                                            | $y_4$    | $y_1 \times y_2 \times y_3$                                                                                                                                                       |
| 2013 | 106.204                                            | $y_3$    | $y_1 \times y_2$                                                                                                                                                                  |
| 2014 | 106.329                                            | $y_2$    | $y_1$                                                                                                                                                                             |
| 2015 | 109.030                                            | $y_1$    | 100                                                                                                                                                                               |

**Table S3.** Results of sensitivity analyses for TV using different lag period of mean temperature.

| Exposure | Lag period     | RR (95%CI)           | <i>P</i> value | <i>P</i> for difference |
|----------|----------------|----------------------|----------------|-------------------------|
| TV0-1    | Lag 0-4 days   | 1.006 (1.004, 1.007) | < 0.001        | 0.111                   |
| TV0-1    | Lag 0-5 days   | 1.005 (1.003, 1.007) | < 0.001        | 0.317                   |
| TV0-1    | Lag 0-6 days   | 1.004 (1.002, 1.006) | < 0.001        | 0.756                   |
| TV0-1    | Lag 0-7 days * | 1.004 (1.002, 1.005) | < 0.001        | Ref.                    |
| TV0-1    | Lag 0-8 days   | 1.003 (1.002, 1.005) | < 0.001        | 0.944                   |
| TV0-1    | Lag 0-9 days   | 1.004 (1.002, 1.005) | < 0.001        | 0.966                   |
| TV0-1    | Lag 0-10 days  | 1.004 (1.002, 1.005) | < 0.001        | 0.965                   |
| TV0-2    | Lag 0-4 days   | 1.008 (1.006, 1.010) | < 0.001        | 0.318                   |
| TV0-2    | Lag 0-5 days   | 1.008 (1.006, 1.010) | < 0.001        | 0.369                   |
| TV0-2    | Lag 0-6 days   | 1.007 (1.005, 1.009) | < 0.001        | 0.673                   |
| TV0-2    | Lag 0-7 days * | 1.006 (1.004, 1.008) | < 0.001        | Ref.                    |
| TV0-2    | Lag 0-8 days   | 1.006 (1.004, 1.008) | < 0.001        | 0.847                   |
| TV0-2    | Lag 0-9 days   | 1.006 (1.004, 1.008) | < 0.001        | 0.687                   |
| TV0-2    | Lag 0-10 days  | 1.006 (1.004, 1.008) | < 0.001        | 0.649                   |
| TV0-3    | Lag 0-4 days   | 1.010 (1.007, 1.012) | < 0.001        | 0.893                   |
| TV0-3    | Lag 0-5 days   | 1.009 (1.007, 1.011) | < 0.001        | 0.752                   |
| TV0-3    | Lag 0-6 days   | 1.009 (1.007, 1.012) | < 0.001        | 0.869                   |
| TV0-3    | Lag 0-7 days * | 1.009 (1.007, 1.012) | < 0.001        | Ref.                    |
| TV0-3    | Lag 0-8 days   | 1.009 (1.007, 1.012) | < 0.001        | 0.974                   |
| TV0-3    | Lag 0-9 days   | 1.009 (1.007, 1.011) | < 0.001        | 0.761                   |
| TV0-3    | Lag 0-10 days  | 1.008 (1.006, 1.011) | < 0.001        | 0.562                   |
| TV0-4    | Lag 0-4 days   | 1.012 (1.009, 1.014) | < 0.001        | 0.219                   |
| TV0-4    | Lag 0-5 days   | 1.009 (1.006, 1.012) | < 0.001        | 0.869                   |
| TV0-4    | Lag 0-6 days   | 1.009 (1.006, 1.011) | < 0.001        | 0.694                   |
| TV0-4    | Lag 0-7 days * | 1.009 (1.007, 1.012) | < 0.001        | Ref.                    |
| TV0-4    | Lag 0-8 days   | 1.010 (1.007, 1.012) | < 0.001        | 0.902                   |
| TV0-4    | Lag 0-9 days   | 1.009 (1.007, 1.012) | < 0.001        | 0.992                   |
| TV0-4    | Lag 0-10 days  | 1.009 (1.006, 1.011) | < 0.001        | 0.807                   |
| TV0-5    | Lag 0-4 days   | 1.013 (1.010, 1.016) | < 0.001        | 0.043                   |
| TV0-5    | Lag 0-5 days   | 1.012 (1.009, 1.015) | < 0.001        | 0.146                   |
| TV0-5    | Lag 0-6 days   | 1.010 (1.007, 1.012) | < 0.001        | 0.788                   |
| TV0-5    | Lag 0-7 days * | 1.009 (1.006, 1.012) | < 0.001        | Ref.                    |
| TV0-5    | Lag 0-8 days   | 1.009 (1.006, 1.012) | < 0.001        | 0.942                   |
| TV0-5    | Lag 0-9 days   | 1.009 (1.006, 1.012) | < 0.001        | 0.945                   |
| TV0-5    | Lag 0-10 days  | 1.009 (1.006, 1.012) | < 0.001        | 0.998                   |
| TV0-6    | Lag 0-4 days   | 1.014 (1.011, 1.017) | < 0.001        | 0.038                   |
| TV0-6    | Lag 0-5 days   | 1.013 (1.010, 1.016) | < 0.001        | 0.063                   |
| TV0-6    | Lag 0-6 days   | 1.012 (1.009, 1.015) | < 0.001        | 0.231                   |
| TV0-6    | Lag 0-7 days * | 1.009 (1.006, 1.012) | < 0.001        | Ref.                    |
| TV0-6    | Lag 0-8 days   | 1.009 (1.006, 1.012) | < 0.001        | 0.798                   |

|       |                |                      |         |       |
|-------|----------------|----------------------|---------|-------|
| TV0-6 | Lag 0-9 days   | 1.009 (1.006, 1.012) | < 0.001 | 0.790 |
| TV0-6 | Lag 0-10 days  | 1.009 (1.006, 1.012) | < 0.001 | 0.809 |
| TV0-7 | Lag 0-4 days   | 1.014 (1.010, 1.017) | < 0.001 | 0.149 |
| TV0-7 | Lag 0-5 days   | 1.013 (1.010, 1.016) | < 0.001 | 0.273 |
| TV0-7 | Lag 0-6 days   | 1.012 (1.009, 1.015) | < 0.001 | 0.529 |
| TV0-7 | Lag 0-7 days * | 1.010 (1.007, 1.014) | < 0.001 | Ref.  |
| TV0-7 | Lag 0-8 days   | 1.009 (1.006, 1.012) | < 0.001 | 0.595 |
| TV0-7 | Lag 0-9 days   | 1.009 (1.005, 1.012) | < 0.001 | 0.426 |
| TV0-7 | Lag 0-10 days  | 1.008 (1.005, 1.012) | < 0.001 | 0.385 |

\*: primary model. Definition of abbreviations: TV = temperature variability; RR = relative risk; CI = confidence interval; Ref. = reference.

**Table S4.** Results of sensitivity analyses for TV using different degrees of freedom for mean temperature.

| Exposure | df for mean temperature | RR (95%CI)           | P value | P for difference |
|----------|-------------------------|----------------------|---------|------------------|
| TV0-1    | 3 *                     | 1.004 (1.002, 1.005) | < 0.001 | Ref.             |
| TV0-1    | 4                       | 1.003 (1.002, 1.005) | < 0.001 | 0.933            |
| TV0-1    | 5                       | 1.003 (1.002, 1.005) | < 0.001 | 0.941            |
| TV0-1    | 6                       | 1.003 (1.002, 1.005) | < 0.001 | 0.928            |
| TV0-2    | 3 *                     | 1.006 (1.004, 1.008) | < 0.001 | Ref.             |
| TV0-2    | 4                       | 1.006 (1.004, 1.008) | < 0.001 | 0.946            |
| TV0-2    | 5                       | 1.006 (1.004, 1.008) | < 0.001 | 0.951            |
| TV0-2    | 6                       | 1.006 (1.004, 1.008) | < 0.001 | 0.941            |
| TV0-3    | 3 *                     | 1.009 (1.007, 1.012) | < 0.001 | Ref.             |
| TV0-3    | 4                       | 1.009 (1.007, 1.012) | < 0.001 | 0.954            |
| TV0-3    | 5                       | 1.009 (1.007, 1.012) | < 0.001 | 0.953            |
| TV0-3    | 6                       | 1.009 (1.007, 1.012) | < 0.001 | 0.946            |
| TV0-4    | 3 *                     | 1.009 (1.007, 1.012) | < 0.001 | Ref.             |
| TV0-4    | 4                       | 1.009 (1.007, 1.012) | < 0.001 | 0.945            |
| TV0-4    | 5                       | 1.009 (1.007, 1.012) | < 0.001 | 0.940            |
| TV0-4    | 6                       | 1.009 (1.007, 1.012) | < 0.001 | 0.934            |
| TV0-5    | 3 *                     | 1.009 (1.006, 1.012) | < 0.001 | Ref.             |
| TV0-5    | 4                       | 1.009 (1.006, 1.012) | < 0.001 | 0.940            |
| TV0-5    | 5                       | 1.009 (1.006, 1.012) | < 0.001 | 0.934            |
| TV0-5    | 6                       | 1.009 (1.006, 1.012) | < 0.001 | 0.929            |
| TV0-6    | 3 *                     | 1.009 (1.006, 1.012) | < 0.001 | Ref.             |
| TV0-6    | 4                       | 1.009 (1.006, 1.012) | < 0.001 | 0.947            |
| TV0-6    | 5                       | 1.009 (1.006, 1.012) | < 0.001 | 0.939            |
| TV0-6    | 6                       | 1.009 (1.006, 1.012) | < 0.001 | 0.935            |
| TV0-7    | 3 *                     | 1.010 (1.007, 1.014) | < 0.001 | Ref.             |
| TV0-7    | 4                       | 1.010 (1.007, 1.013) | < 0.001 | 0.961            |
| TV0-7    | 5                       | 1.010 (1.007, 1.013) | < 0.001 | 0.952            |
| TV0-7    | 6                       | 1.010 (1.007, 1.013) | < 0.001 | 0.949            |

\*: primary model. Definition of abbreviations: TV = temperature variability; df = degrees of freedom; RR = relative risk; CI = confidence interval; Ref. = reference.

**Table S5.** Results of sensitivity analyses for TV using different df for lag days of mean temperature.

| Exposure | df for lag days | RR (95%CI)           | P value | P for difference |
|----------|-----------------|----------------------|---------|------------------|
| TV0-1    | 3 *             | 1.004 (1.002, 1.005) | < 0.001 | Ref.             |
| TV0-1    | 4               | 1.004 (1.002, 1.006) | < 0.001 | 0.664            |
| TV0-1    | 5               | 1.004 (1.003, 1.006) | < 0.001 | 0.549            |
| TV0-1    | 6               | 1.004 (1.003, 1.006) | < 0.001 | 0.539            |
| TV0-2    | 3 *             | 1.006 (1.004, 1.008) | < 0.001 | Ref.             |
| TV0-2    | 4               | 1.007 (1.005, 1.009) | < 0.001 | 0.799            |
| TV0-2    | 5               | 1.007 (1.004, 1.009) | < 0.001 | 0.875            |
| TV0-2    | 6               | 1.007 (1.005, 1.009) | < 0.001 | 0.824            |
| TV0-3    | 3 *             | 1.009 (1.007, 1.012) | < 0.001 | Ref.             |
| TV0-3    | 4               | 1.009 (1.006, 1.011) | < 0.001 | 0.682            |
| TV0-3    | 5               | 1.009 (1.006, 1.011) | < 0.001 | 0.664            |
| TV0-3    | 6               | 1.009 (1.006, 1.011) | < 0.001 | 0.581            |
| TV0-4    | 3 *             | 1.009 (1.007, 1.012) | < 0.001 | Ref.             |
| TV0-4    | 4               | 1.009 (1.006, 1.011) | < 0.001 | 0.680            |
| TV0-4    | 5               | 1.009 (1.006, 1.011) | < 0.001 | 0.741            |
| TV0-4    | 6               | 1.009 (1.006, 1.011) | < 0.001 | 0.797            |
| TV0-5    | 3 *             | 1.009 (1.006, 1.012) | < 0.001 | Ref.             |
| TV0-5    | 4               | 1.009 (1.006, 1.012) | < 0.001 | 0.963            |
| TV0-5    | 5               | 1.009 (1.006, 1.012) | < 0.001 | 0.979            |
| TV0-5    | 6               | 1.009 (1.006, 1.012) | < 0.001 | 0.945            |
| TV0-6    | 3 *             | 1.009 (1.006, 1.012) | < 0.001 | Ref.             |
| TV0-6    | 4               | 1.010 (1.007, 1.013) | < 0.001 | 0.859            |
| TV0-6    | 5               | 1.010 (1.007, 1.013) | < 0.001 | 0.892            |
| TV0-6    | 6               | 1.010 (1.007, 1.013) | < 0.001 | 0.924            |
| TV0-7    | 3 *             | 1.010 (1.007, 1.014) | < 0.001 | Ref.             |
| TV0-7    | 4               | 1.010 (1.007, 1.014) | < 0.001 | 0.944            |
| TV0-7    | 5               | 1.010 (1.007, 1.014) | < 0.001 | 0.965            |
| TV0-7    | 6               | 1.010 (1.007, 1.014) | < 0.001 | 0.994            |

\*: primary model. Definition of abbreviations: TV = temperature variability; df = degrees of freedom; RR = relative risk; CI = confidence interval; Ref. = reference.

**Table S6.** Results of sensitivity analyses for TV using different degrees of freedom for relative humidity.

| Exposure | df for mean temperature | RR (95%CI)           | P value | P for difference |
|----------|-------------------------|----------------------|---------|------------------|
| TV0-1    | 3 *                     | 1.004 (1.002, 1.005) | < 0.001 | Ref.             |
| TV0-1    | 4                       | 1.003 (1.002, 1.005) | < 0.001 | 0.968            |
| TV0-1    | 5                       | 1.003 (1.002, 1.005) | < 0.001 | 0.942            |
| TV0-1    | 6                       | 1.003 (1.002, 1.005) | < 0.001 | 0.921            |
| TV0-2    | 3 *                     | 1.006 (1.004, 1.008) | < 0.001 | Ref.             |
| TV0-2    | 4                       | 1.006 (1.004, 1.008) | < 0.001 | 0.986            |
| TV0-2    | 5                       | 1.006 (1.004, 1.008) | < 0.001 | 0.962            |
| TV0-2    | 6                       | 1.006 (1.004, 1.008) | < 0.001 | 0.941            |
| TV0-3    | 3 *                     | 1.009 (1.007, 1.012) | < 0.001 | Ref.             |
| TV0-3    | 4                       | 1.009 (1.007, 1.012) | < 0.001 | 1.000            |
| TV0-3    | 5                       | 1.009 (1.007, 1.012) | < 0.001 | 0.993            |
| TV0-3    | 6                       | 1.009 (1.007, 1.012) | < 0.001 | 0.982            |
| TV0-4    | 3 *                     | 1.009 (1.007, 1.012) | < 0.001 | Ref.             |
| TV0-4    | 4                       | 1.009 (1.007, 1.012) | < 0.001 | 0.982            |
| TV0-4    | 5                       | 1.009 (1.007, 1.012) | < 0.001 | 0.977            |
| TV0-4    | 6                       | 1.009 (1.007, 1.012) | < 0.001 | 0.981            |
| TV0-5    | 3 *                     | 1.009 (1.006, 1.012) | < 0.001 | Ref.             |
| TV0-5    | 4                       | 1.009 (1.006, 1.012) | < 0.001 | 0.965            |
| TV0-5    | 5                       | 1.009 (1.006, 1.012) | < 0.001 | 0.959            |
| TV0-5    | 6                       | 1.009 (1.006, 1.012) | < 0.001 | 0.961            |
| TV0-6    | 3 *                     | 1.009 (1.006, 1.012) | < 0.001 | Ref.             |
| TV0-6    | 4                       | 1.010 (1.007, 1.013) | < 0.001 | 0.961            |
| TV0-6    | 5                       | 1.010 (1.007, 1.013) | < 0.001 | 0.960            |
| TV0-6    | 6                       | 1.010 (1.007, 1.013) | < 0.001 | 0.962            |
| TV0-7    | 3 *                     | 1.010 (1.007, 1.014) | < 0.001 | Ref.             |
| TV0-7    | 4                       | 1.010 (1.007, 1.014) | < 0.001 | 0.962            |
| TV0-7    | 5                       | 1.010 (1.007, 1.014) | < 0.001 | 0.963            |
| TV0-7    | 6                       | 1.010 (1.007, 1.014) | < 0.001 | 0.966            |

\*: primary model. Definition of abbreviations: TV = temperature variability; df = degrees of freedom; RR = relative risk; CI = confidence interval; Ref. = reference.



**Table S7.** Results of sensitivity analyses for TV using different degrees of freedom for lag days of relative humidity.

| Exposure | df for lag days | RR (95%CI)           | P value | P for difference |
|----------|-----------------|----------------------|---------|------------------|
| TV0-1    | 3 *             | 1.004 (1.002, 1.005) | < 0.001 | Ref.             |
| TV0-1    | 4               | 1.005 (1.003, 1.007) | < 0.001 | 0.329            |
| TV0-1    | 5               | 1.005 (1.003, 1.007) | < 0.001 | 0.280            |
| TV0-1    | 6               | 1.005 (1.003, 1.007) | < 0.001 | 0.269            |
| TV0-2    | 3 *             | 1.006 (1.004, 1.008) | < 0.001 | Ref.             |
| TV0-2    | 4               | 1.006 (1.004, 1.009) | < 0.001 | 0.955            |
| TV0-2    | 5               | 1.006 (1.004, 1.008) | < 0.001 | 0.947            |
| TV0-2    | 6               | 1.006 (1.004, 1.008) | < 0.001 | 0.941            |
| TV0-3    | 3 *             | 1.009 (1.007, 1.012) | < 0.001 | Ref.             |
| TV0-3    | 4               | 1.009 (1.006, 1.011) | < 0.001 | 0.609            |
| TV0-3    | 5               | 1.009 (1.006, 1.011) | < 0.001 | 0.695            |
| TV0-3    | 6               | 1.009 (1.006, 1.011) | < 0.001 | 0.660            |
| TV0-4    | 3 *             | 1.009 (1.007, 1.012) | < 0.001 | Ref.             |
| TV0-4    | 4               | 1.009 (1.006, 1.011) | < 0.001 | 0.813            |
| TV0-4    | 5               | 1.009 (1.007, 1.012) | < 0.001 | 0.909            |
| TV0-4    | 6               | 1.009 (1.007, 1.012) | < 0.001 | 0.955            |
| TV0-5    | 3 *             | 1.009 (1.006, 1.012) | < 0.001 | Ref.             |
| TV0-5    | 4               | 1.009 (1.007, 1.012) | < 0.001 | 0.835            |
| TV0-5    | 5               | 1.009 (1.007, 1.012) | < 0.001 | 0.855            |
| TV0-5    | 6               | 1.009 (1.007, 1.012) | < 0.001 | 0.834            |
| TV0-6    | 3 *             | 1.009 (1.006, 1.012) | < 0.001 | Ref.             |
| TV0-6    | 4               | 1.010 (1.007, 1.013) | < 0.001 | 0.783            |
| TV0-6    | 5               | 1.010 (1.007, 1.013) | < 0.001 | 0.820            |
| TV0-6    | 6               | 1.010 (1.007, 1.013) | < 0.001 | 0.860            |
| TV0-7    | 3 *             | 1.010 (1.007, 1.014) | < 0.001 | Ref.             |
| TV0-7    | 4               | 1.010 (1.007, 1.014) | < 0.001 | 0.999            |
| TV0-7    | 5               | 1.010 (1.007, 1.014) | < 0.001 | 1.000            |
| TV0-7    | 6               | 1.010 (1.007, 1.014) | < 0.001 | 0.991            |

\*: primary model. Definition of abbreviations: TV = temperature variability; df = degrees of freedom; RR = relative risk; CI = confidence interval; Ref. = reference.
